# Supplementary material
Source: PubMed Central journal article supplement (PMC2790582)
Supplement: mmc1.pdf [file mmc1.pdf]

**Supplemental Data**

***AJHG*, Volume 85**

## **Genomic Dissection of Population Substructure of Han**

### **Chinese and Its Implication in Association Studies**

**Shuhua Xu, Xianyong Yin, Shilin Li, Wenfei Jin, Haiyi Lou, Ling Yang, Xiaohong Gong, Hongyan Wang, Yiping Shen, Xuedong Pan, Yungang He, Yajun Yang, Yi Wang, Wenqing Fu, Yu An, Jiucun Wang, Jingze Tan, Ji Qian, Xiaoli Chen, Xin Zhang, Yangfei Sun, Xuejun Zhang, Bailin Wu, and Li Jin**

**Figure S1** Geographical distribution of Han Chinese sample locations (A), sample size (B), average heterozygosity (C), and average PC1 (D) for twenty-six geographical populations.

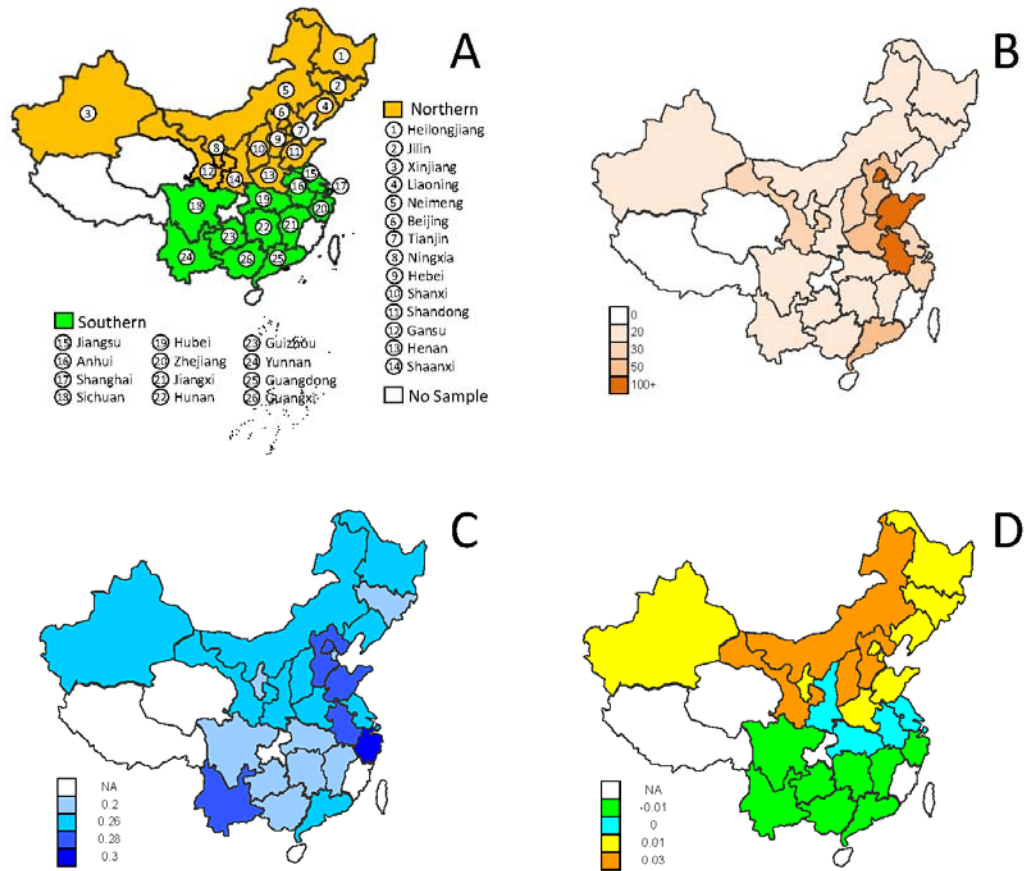

**Figure S2** The relationship between genetic distances ( $F_{ST}$ ) and geographic distances computed using great circle distance. The line in the plot shows the regression line ( $y = -5E-08x + 0.0015$ ).  $R^2$  for the linear regression of genetic distance on geographic distance is 0.0029 ( $p=0.23$ ).

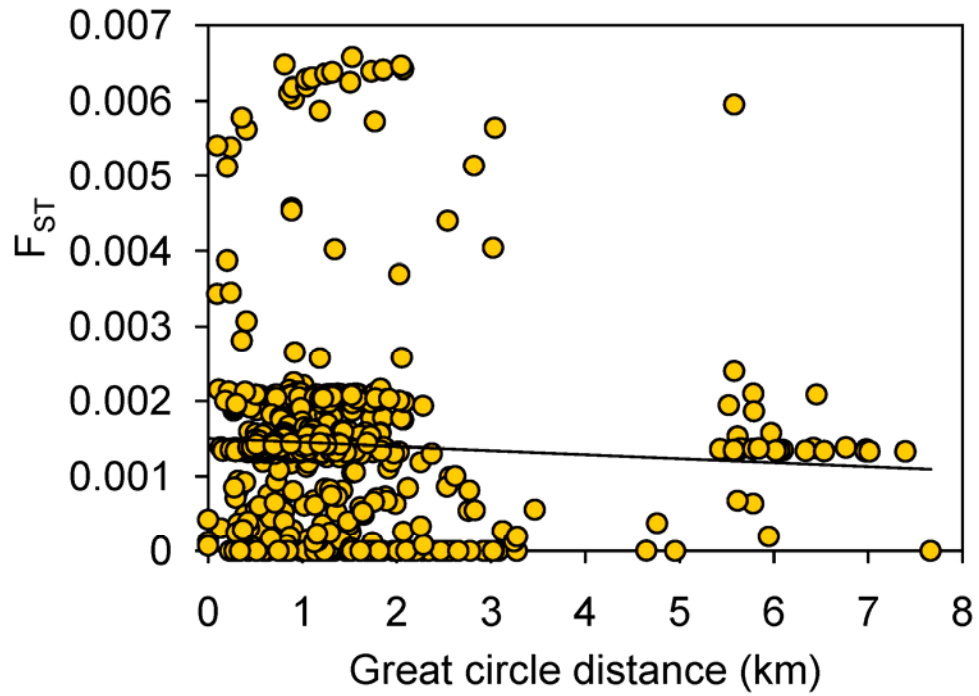

**Figure S3 Principal Components Analysis Showing Genetic Affinities of HapMap Han Chinese Samples.** **A.** Analysis of the first two Principal Components of CHB and three sub-group of Han Chinese; **B.** Distribution of PC1 for CHB and three sub-group of Han Chinese; **C.** Analysis of the first two Principal Components of CHD and three sub-group of Han Chinese; **D.** Distribution of PC1 for CHD and three sub-group of Han Chinese.

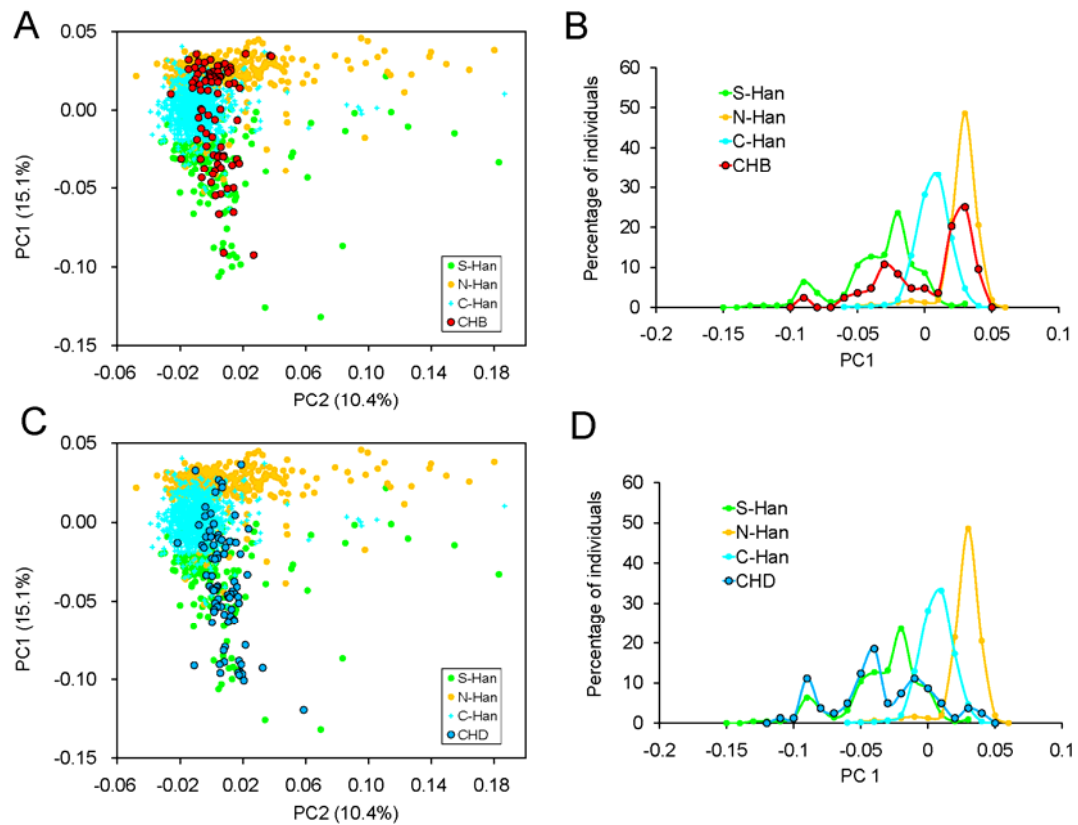

**Figure S4 Principal Components Analysis Showing Genetic Affinities of HGDP Han Chinese Samples.** **A.** Analysis of the first two Principal Components of Han-NChina and three sub-group of Han Chinese; **B.** Distribution of PC1 for Han-NChina and three sub-group of Han Chinese; **C.** Analysis of the first two Principal Components of Han and three sub-group of Han Chinese; **D.** Distribution of PC1 for Han and three sub-group of Han Chinese.

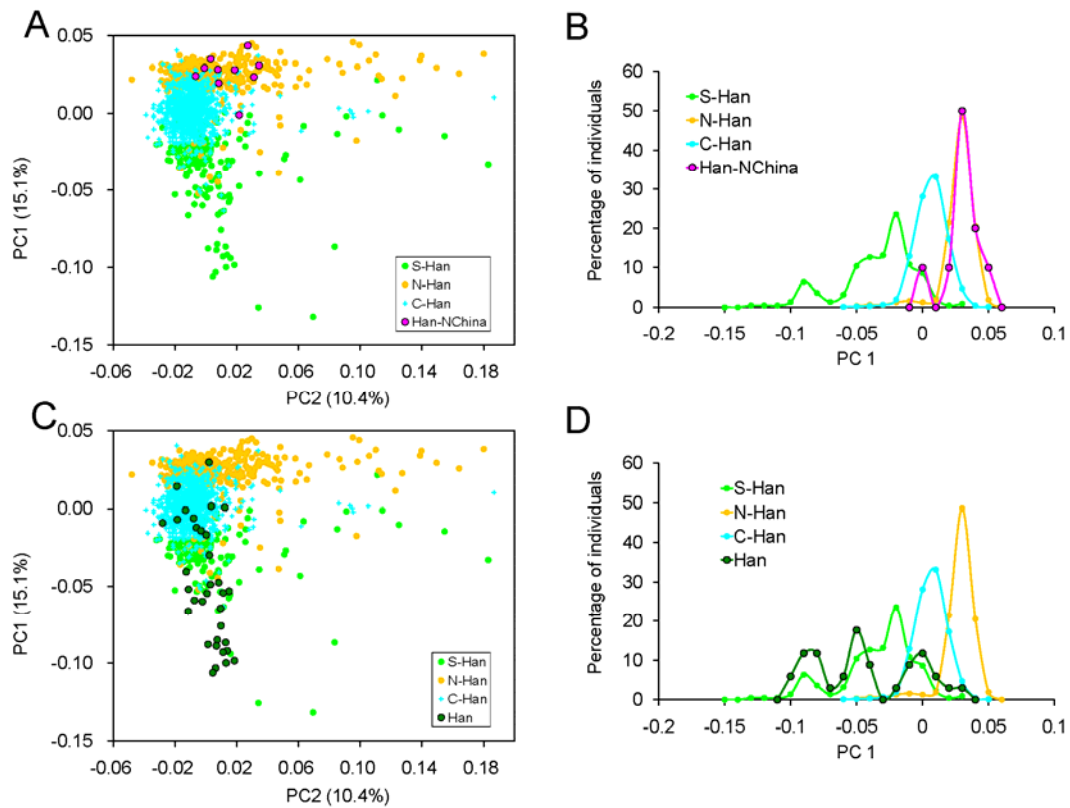

**Figure S5 Principal Components Analysis Showing Genetic Affinities of Metropolitan Han Chinese Samples.** **A.** Analysis of the first two Principal Components of Shanghai and three sub-group of Han Chinese; **B.** Distribution of PC1 for Shanghai and three sub-group of Han Chinese; **C.** Analysis of the first two Principal Components of Beijing and three sub-group of Han Chinese; **D.** Distribution of PC1 for Beijing and three sub-group of Han Chinese; **E.** Analysis of the first two Principal Components of Guangzhou and three sub-group of Han Chinese; **F.** Distribution of PC1 for Guangzhou and three sub-group of Han Chinese.

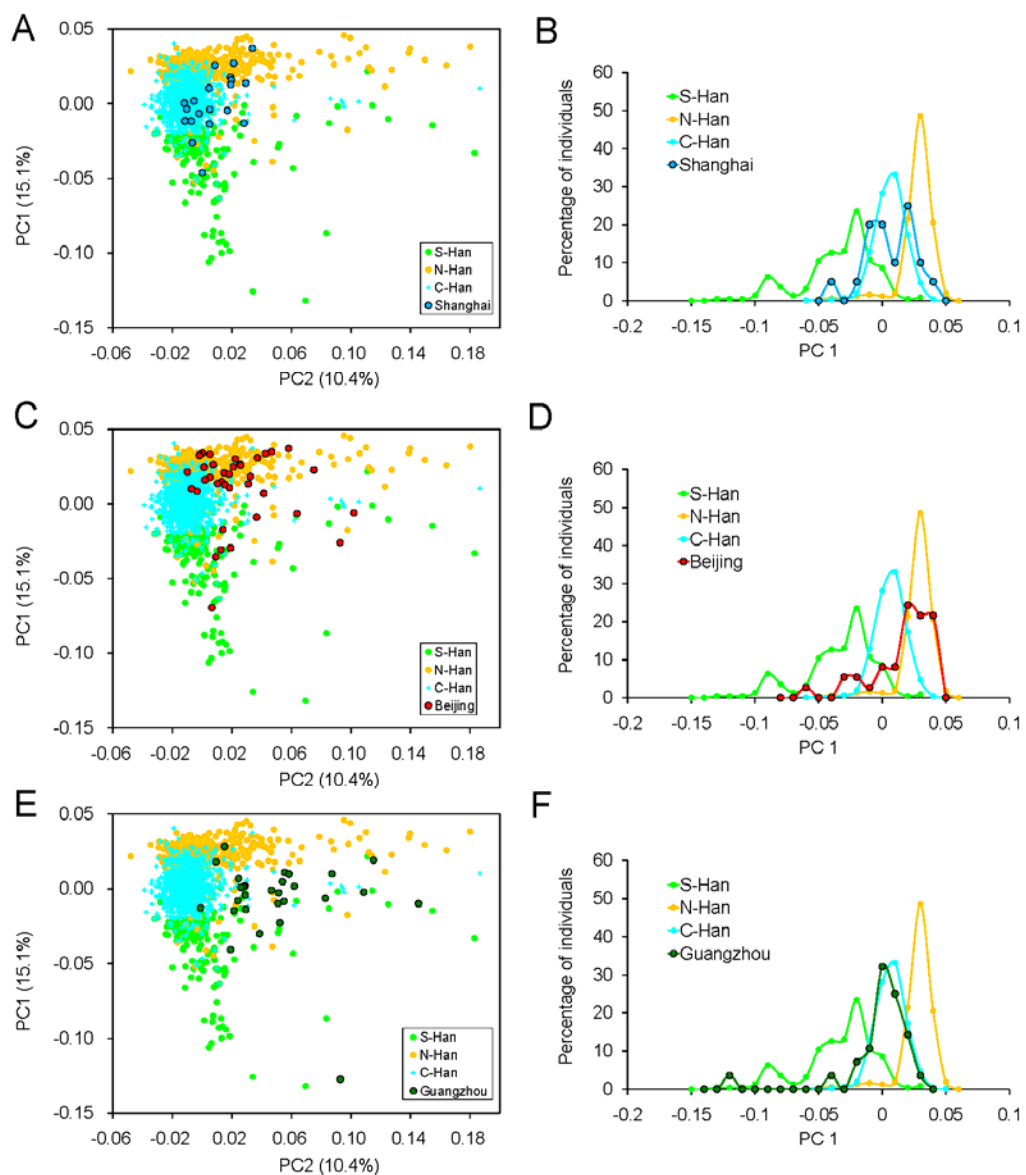

**Figure S6** Distribution of  $F_{ST}$  between NHC and SHC

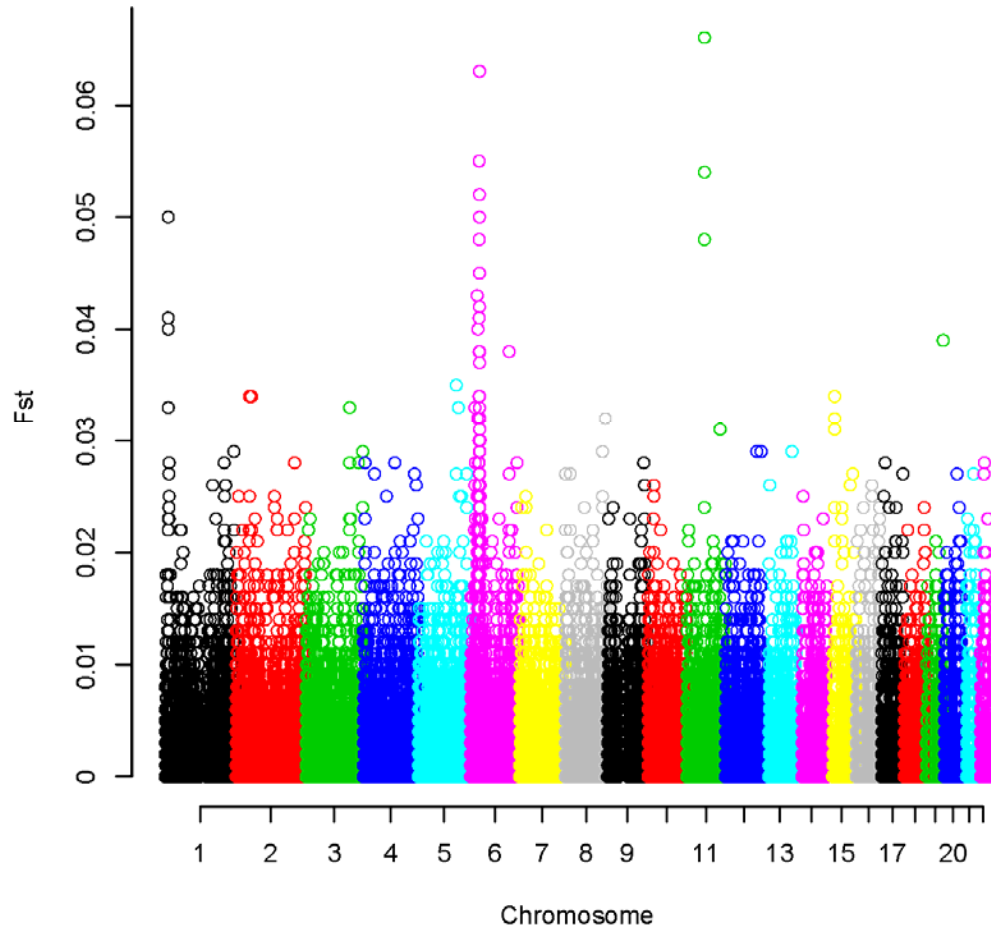

**Figure S7** Distribution of  $F_{ST}$  between NHC and CHC

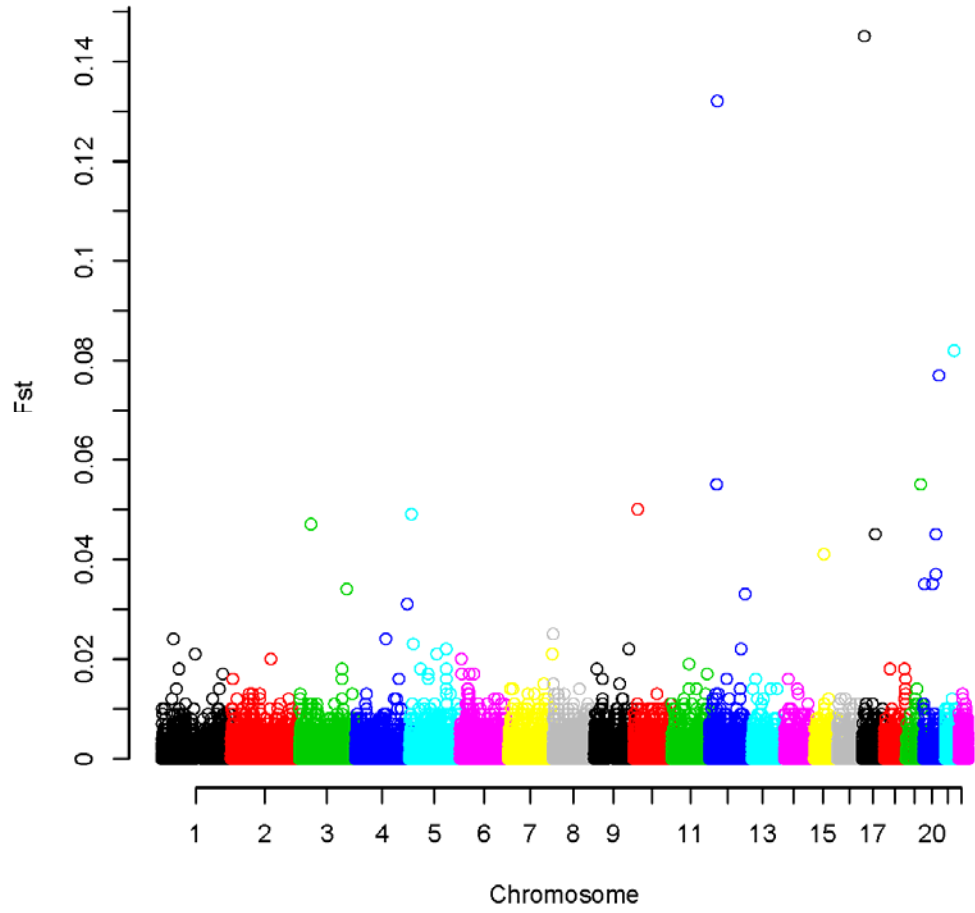



**Figure S8** Distribution of  $F_{ST}$  between CHC and SHC

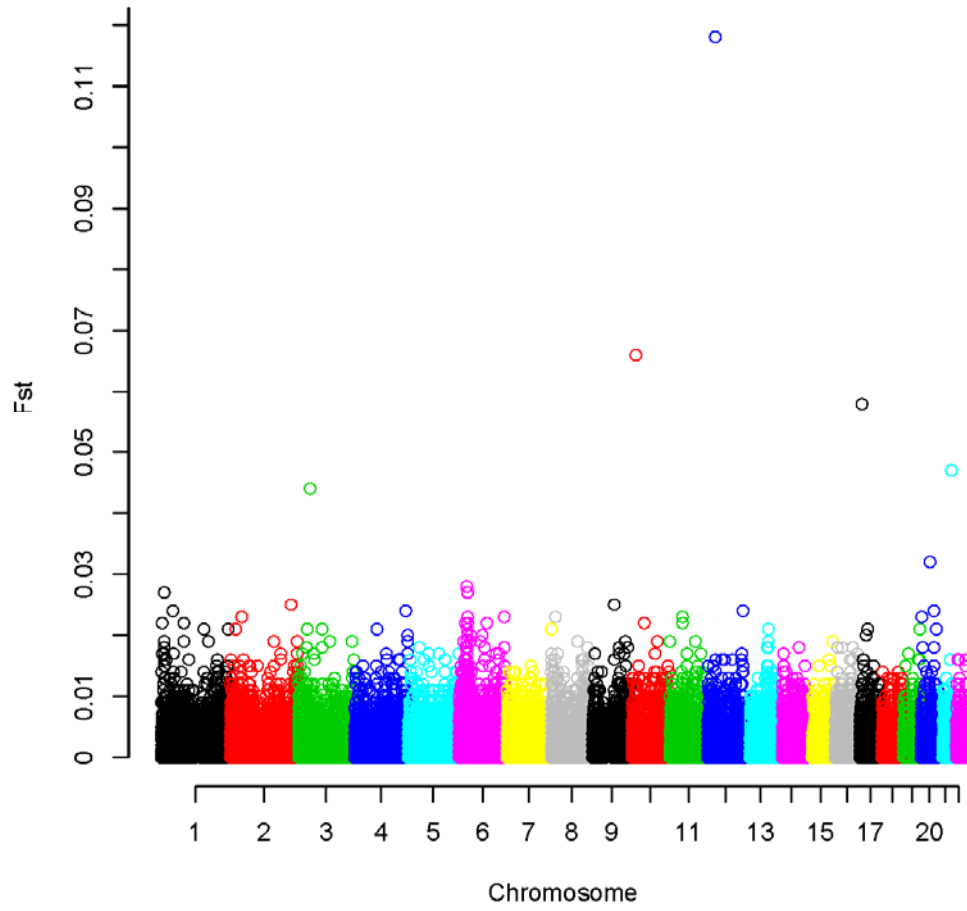

**Table S1** Classification of Han Chinese Individuals into the Three Clusters

|            | NHC  | CHC  | SHC  |
|------------|------|------|------|
| N-Han      | 92.4 | 4.8  | 2.8  |
| C-Han      | 22.5 | 74.2 | 3.3  |
| S-Han      | 1.4  | 10.9 | 87.8 |
| Beijing    | 67.6 | 18.9 | 13.5 |
| Shanghai   | 40.0 | 50.0 | 10.0 |
| Guangzhou  | 17.9 | 67.9 | 14.3 |
| CHB        | 54.8 | 13.1 | 32.1 |
| CHD        | 7.4  | 24.7 | 67.9 |
| Han-NChina | 90.0 | 10.0 | 0.0  |
| Han        | 5.9  | 17.6 | 76.5 |

The numbers are percentages of individuals belonging to the three clusters as defined in the text.

**Table S2** Highly Differentiated SNPs between CHC and SHC

| SNP        | $F_{ST}$ | <i>Raw</i>             | <i>FDR</i>               | Chrom | Position  | Gene            | MIM        | Category   |
|------------|----------|------------------------|--------------------------|-------|-----------|-----------------|------------|------------|
|            |          | <i>p-value</i>         | <i>controled p-value</i> |       |           |                 |            |            |
| rs1975920  | 0.118    | $2.79 \times 10^{-24}$ | $5.32 \times 10^{-18}$   | 12    | 27627253  | <i>PPFIBP1</i>  | 603141     | intron     |
| rs666101   | 0.066    | $4.78 \times 10^{-13}$ | $4.56 \times 10^{-7}$    | 10    | 14468193  | <i>N/A</i>      | <i>N/A</i> | <i>N/A</i> |
| rs3027238  | 0.058    | $1.69 \times 10^{-12}$ | $1.08 \times 10^{-6}$    | 17    | 8075786   | <i>C17orf68</i> | <i>N/A</i> | missense   |
| rs2236479  | 0.047    | $2.45 \times 10^{-10}$ | $1.17 \times 10^{-4}$    | 21    | 45743560  | <i>COL18A1</i>  | 120328     | intron     |
| rs10510719 | 0.044    | $2.64 \times 10^{-7}$  | 0.1007                   | 3     | 41365143  | <i>ULK4</i>     | <i>N/A</i> | intron     |
| rs2378026  | 0.032    | $8.59 \times 10^{-7}$  | 0.2731                   | 20    | 31973312  | <i>N/A</i>      | <i>N/A</i> | <i>N/A</i> |
| rs16893673 | 0.028    | $1.37 \times 10^{-6}$  | 0.3526                   | 6     | 28187055  | <i>N/A</i>      | <i>N/A</i> | <i>N/A</i> |
| rs11803049 | 0.027    | $1.48 \times 10^{-6}$  | 0.3526                   | 1     | 11851482  | <i>N/A</i>      | <i>N/A</i> | <i>N/A</i> |
| rs2517646  | 0.027    | $2.69 \times 10^{-6}$  | 0.5699                   | 6     | 30230554  | <i>TRIM10</i>   | 605701     | intron     |
| rs2076530  | 0.027    | $3.14 \times 10^{-6}$  | 0.5984                   | 6     | 32471794  | <i>BTNL2</i>    | 606000     | missense   |
| rs4672775  | 0.025    | $3.85 \times 10^{-6}$  | 0.6678                   | 2     | 216167219 | <i>N/A</i>      | <i>N/A</i> | <i>N/A</i> |
| rs1339248  | 0.025    | $4.46 \times 10^{-6}$  | 0.7088                   | 9     | 77815460  | <i>PCSK5</i>    | 600488     | intron     |
| rs6700677  | 0.024    | $6.40 \times 10^{-6}$  | 0.9398                   | 1     | 42996076  | <i>LEPRE1</i>   | 610339     | missense   |
| rs10520478 | 0.024    | $7.56 \times 10^{-6}$  | 0.9488                   | 4     | 182532670 | <i>N/A</i>      | <i>N/A</i> | <i>N/A</i> |
| rs2662826  | 0.024    | $7.72 \times 10^{-6}$  | 0.9488                   | 12    | 126198334 | <i>N/A</i>      | <i>N/A</i> | <i>N/A</i> |
| rs2904065  | 0.024    | $8.45 \times 10^{-6}$  | 0.9488                   | 20    | 46219176  | <i>N/A</i>      | <i>N/A</i> | <i>N/A</i> |
| rs11124754 | 0.023    | $8.51 \times 10^{-6}$  | 0.9488                   | 2     | 40729617  | <i>N/A</i>      | <i>N/A</i> | <i>N/A</i> |
| rs1265048  | 0.023    | $9.90 \times 10^{-6}$  | 0.9488                   | 6     | 31189388  | <i>PSORSIC1</i> | <i>N/A</i> | nearGene-5 |
| rs9405015  | 0.023    | $1.09 \times 10^{-5}$  | 0.9488                   | 6     | 31263782  | <i>N/A</i>      | <i>N/A</i> | <i>N/A</i> |
| rs11964284 | 0.023    | $1.09 \times 10^{-5}$  | 0.9488                   | 6     | 161732616 | <i>PARK2</i>    | 602544     | intron     |
| rs10503523 | 0.023    | $1.13 \times 10^{-5}$  | 0.9488                   | 8     | 14862012  | <i>SGCZ</i>     | 608113     | intron     |
| rs751196   | 0.023    | $1.19 \times 10^{-5}$  | 0.9488                   | 11    | 45238288  | <i>SYT13</i>    | 607716     | intron     |
| rs1810636  | 0.023    | $1.21 \times 10^{-5}$  | 0.9488                   | 20    | 2602925   | <i>N/A</i>      | <i>N/A</i> | <i>N/A</i> |

**Table S3** Highly Differentiated SNPs between NHC and CHC

| SNP        | $F_{ST}$ | Raw                    | FDR                       | Chrom | Position  | Gene            | MIM    | Category |
|------------|----------|------------------------|---------------------------|-------|-----------|-----------------|--------|----------|
|            |          | <i>p-value</i>         | <i>controlled p-value</i> |       |           |                 |        |          |
| rs3027238  | 0.145    | $1.43 \times 10^{-40}$ | $2.77 \times 10^{-34}$    | 17    | 8075786   | <i>C17orf68</i> | N/A    | missense |
| rs1975920  | 0.132    | $4.44 \times 10^{-37}$ | $4.29 \times 10^{-31}$    | 12    | 27627253  | <i>PPFIBP1</i>  | 603141 | intron   |
| rs2236479  | 0.082    | $7.23 \times 10^{-23}$ | $4.66 \times 10^{-17}$    | 21    | 45743560  | <i>COL18A1</i>  | 120328 | intron   |
| rs1047972  | 0.077    | $8.26 \times 10^{-21}$ | $4.00 \times 10^{-15}$    | 20    | 54394870  | <i>AURKA</i>    | 603072 | missense |
| rs11047889 | 0.055    | $9.08 \times 10^{-16}$ | $3.51 \times 10^{-10}$    | 12    | 25240755  | <i>LYRM5</i>    | N/A    | intron   |
| rs393412   | 0.055    | $6.58 \times 10^{-15}$ | $2.12 \times 10^{-9}$     | 19    | 53285853  | <i>PLA2G4C</i>  | 603602 | intron   |
| rs666101   | 0.05     | $4.64 \times 10^{-14}$ | $1.28 \times 10^{-8}$     | 10    | 14468193  | N/A             | N/A    | N/A      |
| rs4702506  | 0.049    | $1.55 \times 10^{-13}$ | $3.74 \times 10^{-8}$     | 5     | 7907289   | N/A             | N/A    | N/A      |
| rs10510719 | 0.047    | $2.61 \times 10^{-13}$ | $5.60 \times 10^{-8}$     | 3     | 41365143  | <i>ULK4</i>     | N/A    | intron   |
| rs9906298  | 0.045    | $2.40 \times 10^{-12}$ | $4.64 \times 10^{-7}$     | 17    | 47135249  | <i>CA10</i>     | 604642 | intron   |
| rs2745061  | 0.045    | $5.21 \times 10^{-12}$ | $9.15 \times 10^{-7}$     | 20    | 43505610  | N/A             | N/A    | N/A      |
| rs17238192 | 0.041    | $4.41 \times 10^{-11}$ | $7.10 \times 10^{-6}$     | 15    | 53302238  | <i>RAB27A</i>   | 603868 | intron   |
| rs2664581  | 0.037    | $2.32 \times 10^{-10}$ | $3.45 \times 10^{-5}$     | 20    | 43237936  | <i>PI3</i>      | 182257 | missense |
| rs1810636  | 0.035    | $2.66 \times 10^{-10}$ | $3.67 \times 10^{-5}$     | 20    | 2602925   | N/A             | N/A    | N/A      |
| rs2378026  | 0.035    | $5.18 \times 10^{-10}$ | $6.68 \times 10^{-5}$     | 20    | 31973312  | N/A             | N/A    | N/A      |
| rs10936526 | 0.034    | $3.08 \times 10^{-9}$  | $3.72 \times 10^{-4}$     | 3     | 168470295 | <i>ZBBX</i>     | N/A    | intron   |
| rs2662826  | 0.033    | $5.90 \times 10^{-8}$  | $6.71 \times 10^{-3}$     | 12    | 126198334 | N/A             | N/A    | N/A      |

**Table S4** Case-Control Simulation Studies

| Scenario | Case       |            |            | Control |     |     | $\lambda$ | False positives (%) |      |      |      | Power (%)  |      |      |      |
|----------|------------|------------|------------|---------|-----|-----|-----------|---------------------|------|------|------|------------|------|------|------|
|          | NHC        | CHC        | SHC        | NHC     | CHC | SHC |           | Unadjusted          | GC   | BONF | FDR  | Unadjusted | GC   | BONF | FDR  |
| II       |            | 300 (100%) | 0 (0%)     |         | 300 |     | 1.07      | 4.95                | 3.95 | 0.00 | 0.00 | 85.9       | 84.0 | 2.6  | 25.2 |
| XXI      |            | 240 (80%)  | 60 (20%)   |         | 300 |     | 1.09      | 5.12                | 3.96 | 0.00 | 0.00 | 85.9       | 83.9 | 2.6  | 25.2 |
| XXII     |            | 210 (70%)  | 90 (30%)   |         | 300 |     | 1.13      | 5.26                | 3.88 | 0.00 | 0.00 | 85.9       | 83.5 | 2.6  | 25.2 |
| XXIII    |            | 180 (60%)  | 120 (40%)  |         | 300 |     | 1.14      | 5.36                | 3.87 | 0.00 | 0.00 | 85.9       | 83.2 | 2.6  | 25.2 |
| XXIV     |            | 150 (50%)  | 150 (50%)  |         | 300 |     | 1.26      | 6.89                | 3.99 | 0.00 | 0.01 | 85.9       | 80.2 | 2.6  | 26.8 |
| XXV      |            | 100 (33%)  | 200 (67%)  |         | 300 |     | 1.28      | 7.25                | 4.04 | 0.00 | 0.01 | 85.9       | 80.1 | 2.6  | 26.9 |
| VI       |            | 0 (0%)     | 300 (100%) |         | 300 |     | 1.30      | 7.18                | 3.94 | 0.00 | 0.01 | 85.9       | 80.0 | 2.6  | 26.9 |
| II       | 0 (0%)     | 300 (100%) |            |         | 300 |     | 1.07      | 4.95                | 3.95 | 0.00 | 0.00 | 85.9       | 84.0 | 2.6  | 25.2 |
| XXVI     | 60 (20%)   | 240 (80%)  |            |         | 300 |     | 1.09      | 5.25                | 4.04 | 0.00 | 0.00 | 85.9       | 83.9 | 2.6  | 25.3 |
| XXVII    | 90 (30%)   | 210 (70%)  |            |         | 300 |     | 1.11      | 5.42                | 4.01 | 0.00 | 0.00 | 85.9       | 83.5 | 2.6  | 25.3 |
| XXVIII   | 120 (40%)  | 180 (60%)  |            |         | 300 |     | 1.12      | 5.49                | 4.06 | 0.01 | 0.01 | 85.9       | 83.4 | 2.6  | 25.4 |
| XXIX     | 150 (50%)  | 150 (50%)  |            |         | 300 |     | 1.15      | 5.80                | 3.95 | 0.00 | 0.00 | 85.9       | 82.5 | 2.6  | 26.0 |
| XXX      | 200 (67%)  | 100 (33%)  |            |         | 300 |     | 1.18      | 6.04                | 3.95 | 0.01 | 0.01 | 85.9       | 81.5 | 2.6  | 26.1 |
| V        | 300 (100%) | 0 (0%)     |            |         | 300 |     | 1.20      | 6.31                | 3.90 | 0.02 | 0.02 | 85.9       | 80.9 | 2.6  | 26.8 |

**Table S5** Case-Control Simulation Studies

| Scenario | Case       |            |            | Control |     |     | $\lambda$ | False positives (%) |      |      |      | Power (%)  |      |      |      |
|----------|------------|------------|------------|---------|-----|-----|-----------|---------------------|------|------|------|------------|------|------|------|
|          | NHC        | CHC        | SHC        | NHC     | CHC | SHC |           | Unadjusted          | GC   | BONF | FDR  | Unadjusted | GC   | BONF | FDR  |
| III      | 0 (0%)     |            | 300 (100%) |         |     | 300 | 1.05      | 4.81                | 3.80 | 0.00 | 0.00 | 85.9       | 84.3 | 2.6  | 24.8 |
| XXXI     | 60 (20%)   |            | 240 (80%)  |         |     | 300 | 1.24      | 6.53                | 3.97 | 0.00 | 0.01 | 85.9       | 80.6 | 2.6  | 26.2 |
| XXXII    | 90 (30%)   |            | 210 (70%)  |         |     | 300 | 1.25      | 6.68                | 3.94 | 0.00 | 0.01 | 85.9       | 80.3 | 2.6  | 25.8 |
| XXXIII   | 120 (40%)  |            | 180 (60%)  |         |     | 300 | 1.27      | 6.88                | 3.94 | 0.00 | 0.01 | 85.9       | 80.1 | 2.6  | 26.3 |
| XXIV     | 150 (50%)  |            | 150 (50%)  |         |     | 300 | 1.28      | 7.19                | 3.97 | 0.00 | 0.01 | 85.9       | 80.1 | 2.6  | 26.8 |
| XXXV     | 200 (67%)  |            | 100 (33%)  |         |     | 300 | 1.35      | 7.84                | 3.87 | 0.00 | 0.00 | 85.9       | 79.7 | 2.6  | 27.4 |
| IV       | 300 (100%) |            | 0 (0%)     |         |     | 300 | 1.74      | 11.61               | 3.69 | 0.03 | 0.07 | 85.9       | 71.9 | 2.6  | 38.4 |
| III      |            | 0 (0%)     | 300 (100%) |         |     | 300 | 1.05      | 4.81                | 3.80 | 0.00 | 0.00 | 85.9       | 84.3 | 2.6  | 24.8 |
| XXXVI    |            | 60 (20%)   | 240 (80%)  |         |     | 300 | 1.21      | 6.45                | 3.98 | 0.00 | 0.00 | 85.9       | 80.7 | 2.6  | 26.1 |
| XXXVII   |            | 90 (30%)   | 210 (70%)  |         |     | 300 | 1.23      | 6.53                | 3.99 | 0.00 | 0.00 | 85.9       | 80.7 | 2.6  | 26.3 |
| XXXVIII  |            | 120 (40%)  | 180 (60%)  |         |     | 300 | 1.24      | 6.67                | 4.02 | 0.00 | 0.00 | 85.9       | 80.5 | 2.6  | 26.6 |
| XXXIX    |            | 150 (50%)  | 150 (50%)  |         |     | 300 | 1.24      | 6.76                | 3.96 | 0.00 | 0.01 | 85.9       | 80.3 | 2.6  | 26.8 |
| XL       |            | 200 (67%)  | 100 (33%)  |         |     | 300 | 1.27      | 6.85                | 3.85 | 0.00 | 0.01 | 85.9       | 80.1 | 2.6  | 26.8 |
| VI       |            | 300 (100%) | 0 (0%)     |         |     | 300 | 1.30      | 7.18                | 3.94 | 0.00 | 0.01 | 85.9       | 80.0 | 2.6  | 26.9 |
